# Supplementary material for: Genome-wide association analysis identifies genetic variations in subjects with myalgic encephalomyelitis/chronic fatigue syndrome
Source: PubMed Central journal article supplement (PMC4872418; doi:10.1038/tp.2015.208), 2016-02-09
Supplement: tp2015208x1.pdf [file tp2015208x1.pdf]

Outcome: Disease  
 Design: Unmatched case-control (1:1)  
 Hypothesis: Gene only  
 Desired power: 0.800000  
 Significance: 0.050000, 2-sided  
 Gene  
   Mode of inheritance: Log-additive  
   Allele frequency: 0.0800 to 0.5000 by 0.0700  
 Disease model Summary parameters  
   \* $P_0$  0.003000  $k_P$  0.003000  
    $R_G$ : 1.0000 (\*indicates calculated value)

| Parameter | Null        | Full      | Reduced |
|-----------|-------------|-----------|---------|
| Gene      | $\beta_G=0$ | $\beta_G$ | —       |

| Frequency | $R_G$    | N                |                  |
|-----------|----------|------------------|------------------|
|           |          | Gene             | $P_0$            |
| 0.080000  | 1.0000   | Cannot calculate | 0.003000         |
|           | 1.5000   | 551              | 0.002775         |
|           | 2.0000   | 170              | 0.002574         |
|           | 2.5000   | 90               | 0.002395         |
|           | 3.0000   | 59               | 0.002234         |
|           | 3.5000   | 44               | 0.002090         |
|           | 4.0000   | 34               | 0.001959         |
|           | 4.5000   | 28               | 0.001841         |
|           | 5.0000   | 24               | 0.001733         |
|           | 0.150000 | 1.0000           | Cannot calculate |
| 1.5000    |          | 329              | 0.002597         |
| 2.0000    |          | 104              | 0.002271         |
| 2.5000    |          | 57               | 0.002004         |
| 3.0000    |          | 38               | 0.001781         |
| 3.5000    |          | 29               | 0.001594         |
| 4.0000    |          | 23               | 0.001435         |
| 4.5000    |          | 20               | 0.001299         |
| 5.0000    |          | 17               | 0.001182         |
| 0.220000  |          | 1.0000           | Cannot calculate |
|           | 1.5000   | 252              | 0.002437         |
|           | 2.0000   | 82               | 0.002019         |
|           | 2.5000   | 46               | 0.001701         |
|           | 3.0000   | 32               | 0.001452         |
|           | 3.5000   | 24               | 0.001255         |
|           | 4.0000   | 20               | 0.001095         |
|           | 4.5000   | 17               | 0.000965         |
|           | 5.0000   | 15               | 0.000856         |
|           | 0.290000 | 1.0000           | Cannot calculate |
| 1.5000    |          | 217              | 0.002290         |
| 2.0000    |          | 72               | 0.001806         |
| 2.5000    |          | 41               | 0.001461         |
| 3.0000    |          | 29               | 0.001207         |
| 3.5000    |          | 22               | 0.001013         |
| 4.0000    |          | 19               | 0.000863         |
| 4.5000    |          | 16               | 0.000744         |
| 5.0000    |          | 14               | 0.000648         |

|          |          |                  |                  |
|----------|----------|------------------|------------------|
| 0.360000 | 1.0000   | Cannot calculate | 0.003000         |
|          | 1.5000   | 200              | 0.002157         |
|          | 2.0000   | 68               | 0.001625         |
|          | 2.5000   | 40               | 0.001269         |
|          | 3.0000   | 28               | 0.001018         |
|          | 3.5000   | 22               | 0.000835         |
|          | 4.0000   | 18               | 0.000697         |
|          | 4.5000   | 16               | 0.000591         |
|          | 5.0000   | 14               | 0.000508         |
|          | 0.430000 | 1.0000           | Cannot calculate |
| 1.5000   |          | 193              | 0.002035         |
| 2.0000   |          | 67               | 0.001470         |
| 2.5000   |          | 40               | 0.001112         |
| 3.0000   |          | 28               | 0.000871         |
| 3.5000   |          | 23               | 0.000700         |
| 4.0000   |          | 19               | 0.000575         |
| 4.5000   |          | 17               | 0.000481         |
| 5.0000   |          | 15               | 0.000408         |
| 0.500000 |          | 1.0000           | Cannot calculate |
|          | 1.5000   | 195              | 0.001923         |
|          | 2.0000   | 69               | 0.001336         |
|          | 2.5000   | 41               | 0.000983         |
|          | 3.0000   | 30               | 0.000753         |
|          | 3.5000   | 24               | 0.000595         |
|          | 4.0000   | 20               | 0.000482         |
|          | 4.5000   | 18               | 0.000399         |
|          | 5.0000   | 16               | 0.000335         |

N is the number of cases required for the desired power

The required number of controls is 1xN
